# Supplementary material for: Diverse values of nature can drive transformative change in the WEFE nexus governance in Mediterranean countries
Source: Springer Nature journal article supplement (doi:10.1007/s11625-025-01757-w), 2025-10-28
Supplement: MOESM1 [file 11625_2025_1757_MOESM1_ESM.docx]

**Appendix 1.** Interview guideline.

*Introduction to the interview*

*Part I. The following are questions about how diverse types of values we associate to nature*

1. Are water, energy, food, and ecosystems of your region and its environment important to you? Yes/No
2. Can you tell us why?

...............................................................................................................................................................................................................................................................................................................................................................................................................................................................................................................................................

1. How is your opinion about the relationship among water, energy, food, and land in your region?

...............................................................................................................................................................................................................................................................................................................................................................................................................................................................................................................................................

Can you indicate which ones and explain why?

□ water, energy, food, and land in my region gives me different material benefits and allows me to have economic benefits to support my well-being

Why?

..........................................................................................................................................................................................................................................................................................................................................................................................................................................................................................................................................................................................................................................................................................................................

□ The water, energy, food, and land in my region allows me to relate to nature and connect with it in a way that is part of my culture and identity

Why?

...............................................................................................................................................................................................................................................................................................................................................................................................................................................................................................................................................

□ The water, energy, food, and land in my region are important because nature has its right to exist

Why? ...............................................................................................................................................................................................................................................................................................................................................................................................................................................................................................................................................

*Part II. The following are questions about how you relate with nature.*

MATERIAL

1. At an individual or family level, do you consume products that come from your region?

Nothing / Little / Some / A lot / Everything

Why?

…………………………………………………………………………………………………………………………………………………………………………………………………………………………………………………………………………………………….…………………………………………………………………………………………………………………………………………………………

EXPERIMENTAL

1. In your opinion, what is your relationship with nature and landscapes of your region?

Very negative / Negative / Neither negative nor positive / Positive / Very positive

Why?

…………………………………………………………………………………………………………………………………………………………………………………………………………………………………………………………………………………………….………………………………………………………………………………

1. Do you have experiences with water, energy, food, and land in your region?

What is the reason for this contact? (You can check different options)

a) Sport

b) Agriculture

c) Other type of work (which one?)

d) Relaxing

e) Recreation activities

f) Traditional festivals and cultural practices

g) Tourism

h) Spend time with family/friends

i) Local food and gastronomy

l) Religious reasons

m) Others:

1. Can you tell us about an experience with water, food, energy or nature you had in the past that brings good memories in your region?

…………………………………………………………………………………………………………………………………………………………………………………………………………………………………………………………………………………………….…………………………………………………………………………………………………………………………………………………………

COGNITIVE

1. How much knowledge do you have about water, food, energy, and nature of your region?

Very bad / Bad / Neither bad, nor good / Good / Very good

Why?

…………………………………………………………………………………………………………………………………………………………………………………………………………………………………………………………………………………………….………………………………………………………………………………..…………………………………………………………………………

1. Describe your region and its natural resources in your words. (Please, tell us the first 3 words that come to mind)

…………………………………………………………………………………………………………………………………………………………………………………………………………………………………………………………………………………………….………………………………………………………………………………..…………………………………………………………………………

EMOTIONAL

1. What emotions come to your mind when thinking of your region:

Very negative / Negative / Neither negative nor positive / Positive / Very positive

Tell me what emotion or feeling would best define it:

Why?

…………………………………………………………………………………………………………………………………………………………………………………………………………………………………………………………………………………………….………………………………………………………………………………..…………………………………………………………………………

PHILOSOPHICAL

11. How important is in general nature (ie. water, food, energy, land, ecosystems) to you?

Very little important / Little important / Neither much nor little importance / Important / Very important

Why?

…………………………………………………………………………………………………………………………………………………………………………………………………………………………………………………………………………………………….………………………………………………………………………………..…………………………………………………………………………

*Part III Sociodemographic information*

Age:

Gender:

Profile:

Level of Studies:
